# Supplementary material for: Dichloroacetate and Quercetin Prevent Cell Proliferation, Induce Cell Death and Slow Tumor Growth in a Mouse Model of HPV-Positive Head and Neck Cancer
Source: MDPI journal article supplement (doi:10.3390/cancers16081525), 2024-04-17
Supplement: s1 [file s1]

# Supplementary Figures:

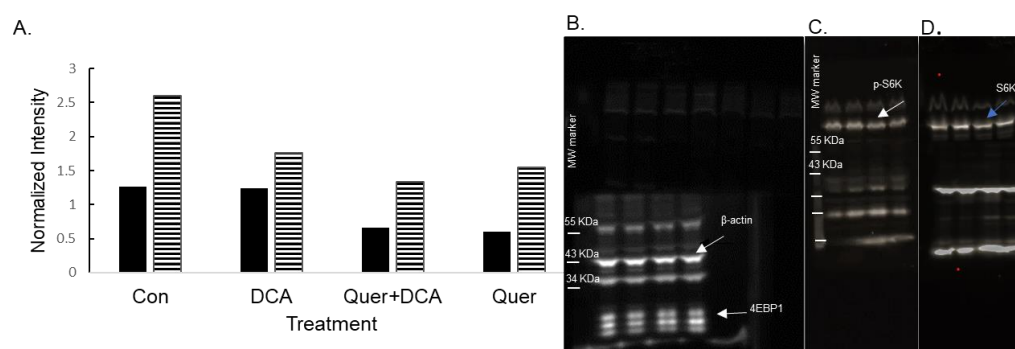

**Figure. S1.** A) Quantification using Image J of the mean band intensity from Figure 1. Mean band intensity of pS6 and 4EBP1 relative to the mean band intensity of the house keeping gene β-actin. B) Image of original membrane probed for 4EBP1 and β-actin. C) Image of membrane probed with anti-pS6K. D) Membrane probed with anti-S6K.

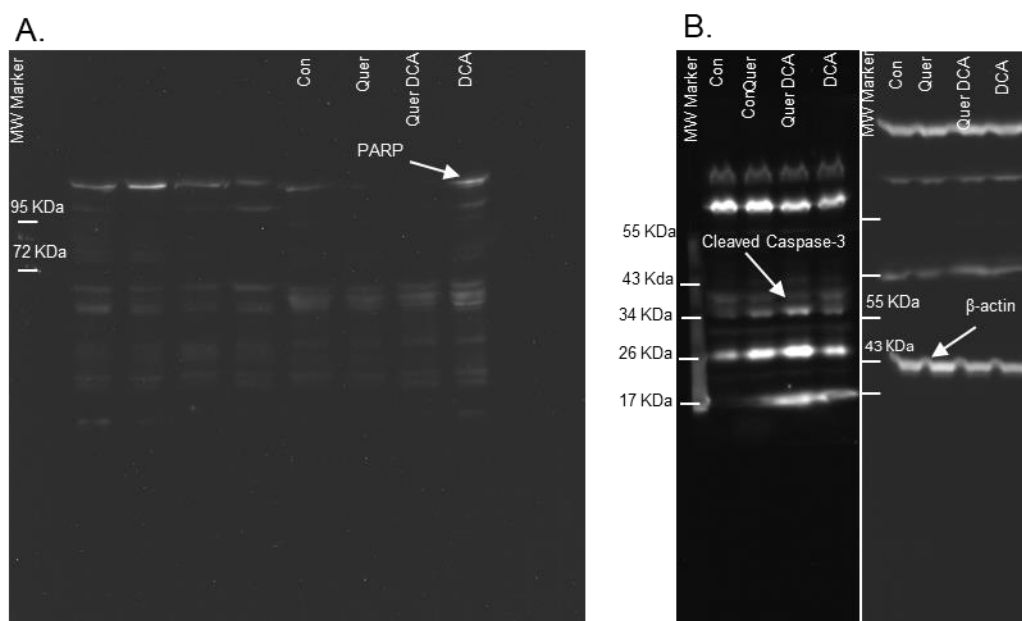

**Figure S2.** Original western blots of western blot depicted in Fig.2. A) Arrow indicates presence of PARP following drug treatments specified in Fig. 2. B) Expression of caspase-3 and β-actin (indicated by arrowhead) following treatment of drugs.

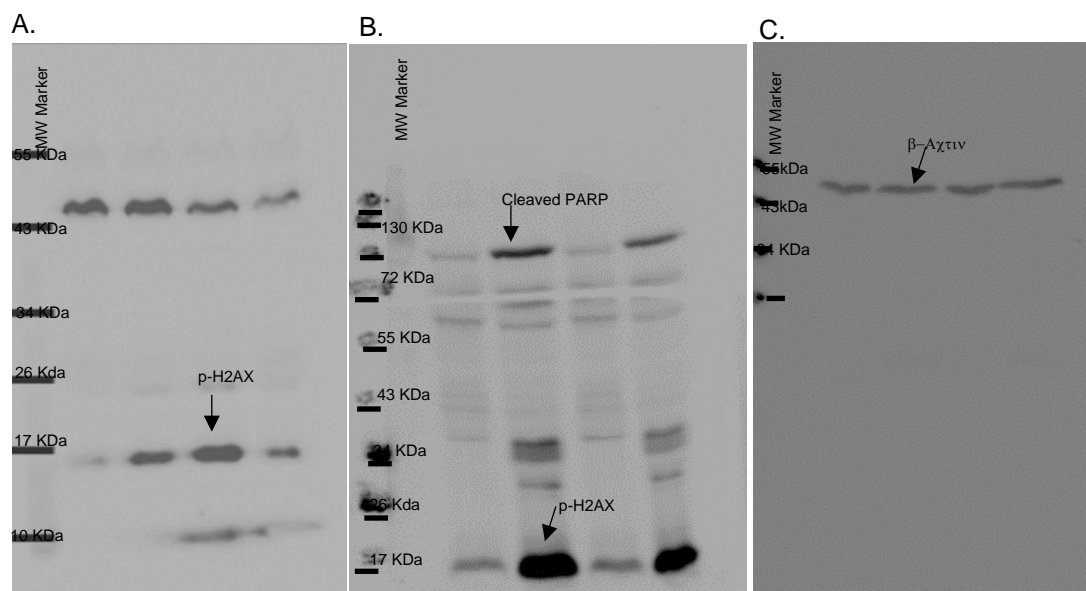

**Figure S3.** Original membrane for western blots illustrated for Fig 3c. A) p-H2AX band indicated with arrowhead. B) Cleaved PARP and pH2AX indicated by arrowhead. C) Housing keeping gene  $\beta$ -Actin indicated by arrowhead.
